# Supplementary material for: Nd:YAG Laser Hyaloidotomy for the Treatment of Acute Subhyaloid Hemorrhage: A Comparison of Two Cases
Source: Springer Nature journal article supplement (doi:10.1007/s40123-015-0043-1), 2015-12-22
Supplement: MOESM1 [file 9340022]

- Premacular subhyaloid hemorrhage leads to a rapid, painless decrease of vision.
- Numerous pathological changes in the fundus (vasoproliferative diseases such as ischemic retinal venous thromboses, diabetic retinopathy, as well as vascular anomalies such as a retinal macroaneurysms) are possible causes.
- Serious general conditions should be considered (e.g., Terson syndrome, leukemia, and coagulation disorders).
- Nd:YAG laser hyaloidotomy in the context of subhyaloid hemorrhage represents a minimally invasive treatment option. The advantages are good availability, low costs, low rate of complications, and a short convalescence period.
- Blood drainage into the vitreous cavity may cause a decrease in visual acuity and extend period of convalescence.

This summary slide represents the opinions of the authors. No funding or sponsorship was received for this study or publication of this article. For a full list of acknowledgments and disclosures for all authors of this article, please see the full text online. © The Author(s) 2015. Creative Commons Attribution Noncommercial License (CC BY-NC).
